# Supplementary material for: Urban pluvial flood risk assessment – data resolution and spatial scale when developing screening approaches on the micro scale
Source: Copernicus journal article supplement (doi:10.5194/nhess-2019-272), 2019-08-30
Supplement: Supplementary file 1 [file nhess-2019-272-supplement.pdf]

# Supplementary information for “Urban pluvial flood risk assessment - data resolution and spatial scale when developing screening approaches on the micro scale”

Roland Löwe<sup>1</sup>, Karsten Arnbjerg-Nielsen<sup>1</sup>

5 <sup>1</sup>Section of Urban Water Systems, Department of Environmental Engineering, Technical University of Denmark (DTU), Kgs. Lyngby, Denmark.

*Correspondence to:* Roland Löwe (rolo@env.dtu.dk)

## S1 Relationship between impervious area and building area in the case study

Figure S 1 illustrates scatterplots of total impervious area vs. total building area after aggregating the original polygon data to  
10 grids with varying pixel sizes.

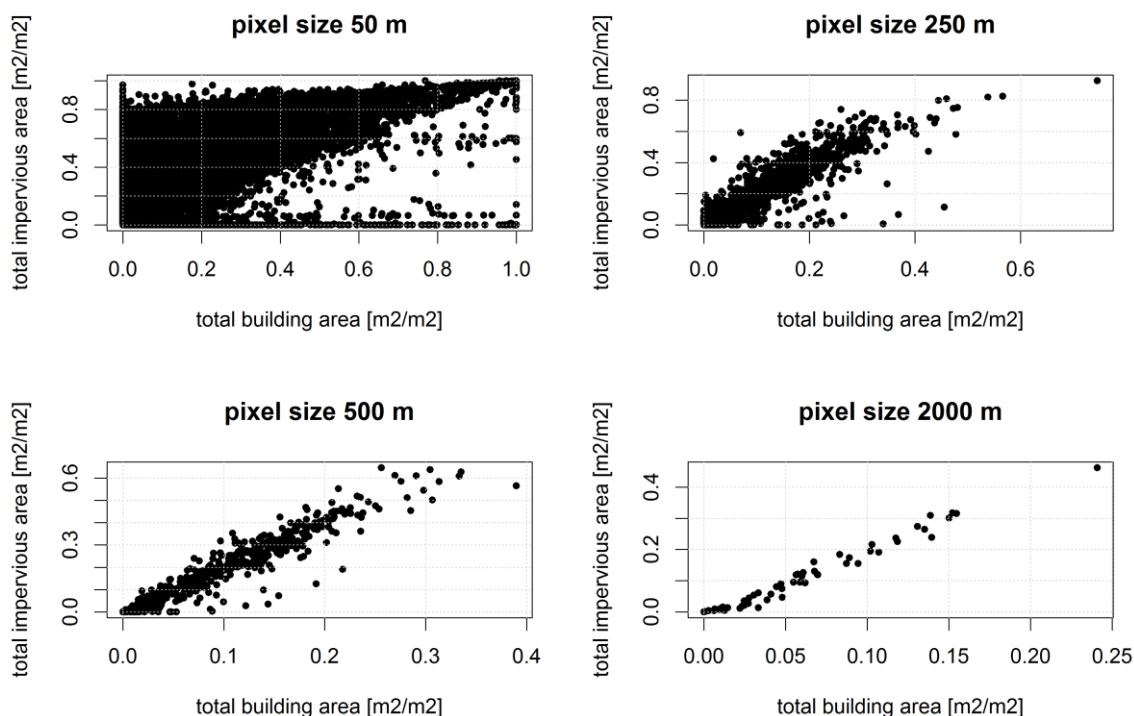

Figure S 1. Scatterplots of impervious area vs. total building area after aggregation to different pixel sizes.

## S2 Regression coefficients for predicting imperviousness ratios in 2D flood simulations

For 2D flood simulation, impervious areas were calculated based on aggregated building datasets using the regression relationship below. The coefficients were derived with a raster resolution of 400m and the units of both input data and predicted impervious area are [m<sup>2</sup>/m<sup>2</sup>]. Building types are summarized in Table S 1. Footprint areas for utility buildings were not  
5 considered in this relationship because the associate coefficients were consistently found to be insignificant.

$$\begin{aligned} A_{imp} = & 2.08A_{bf,commercial} + 1.45A_{bf,cultural} + 1.64A_{bf,industrial} + 0.23A_{bf,agricultural} \\ & + 1.55A_{bf,public\ residence} + 1.99A_{bf,public\ services} + 2.22A_{bf,residential\ block} \\ & + 1.93A_{bf,residential\ detached} + 2.08A_{bf,residential\ rowhouse} \\ & + 1.24A_{bf,general\ services} \end{aligned} \quad (1)$$

### S3 Infiltration rates for 2D flood simulations

Figure S 2 illustrates maps of infiltration rates that were used to parameterize the 2D flood simulations in the baseline simulation and for a situation where the building data were aggregated to a resolution of 500m.

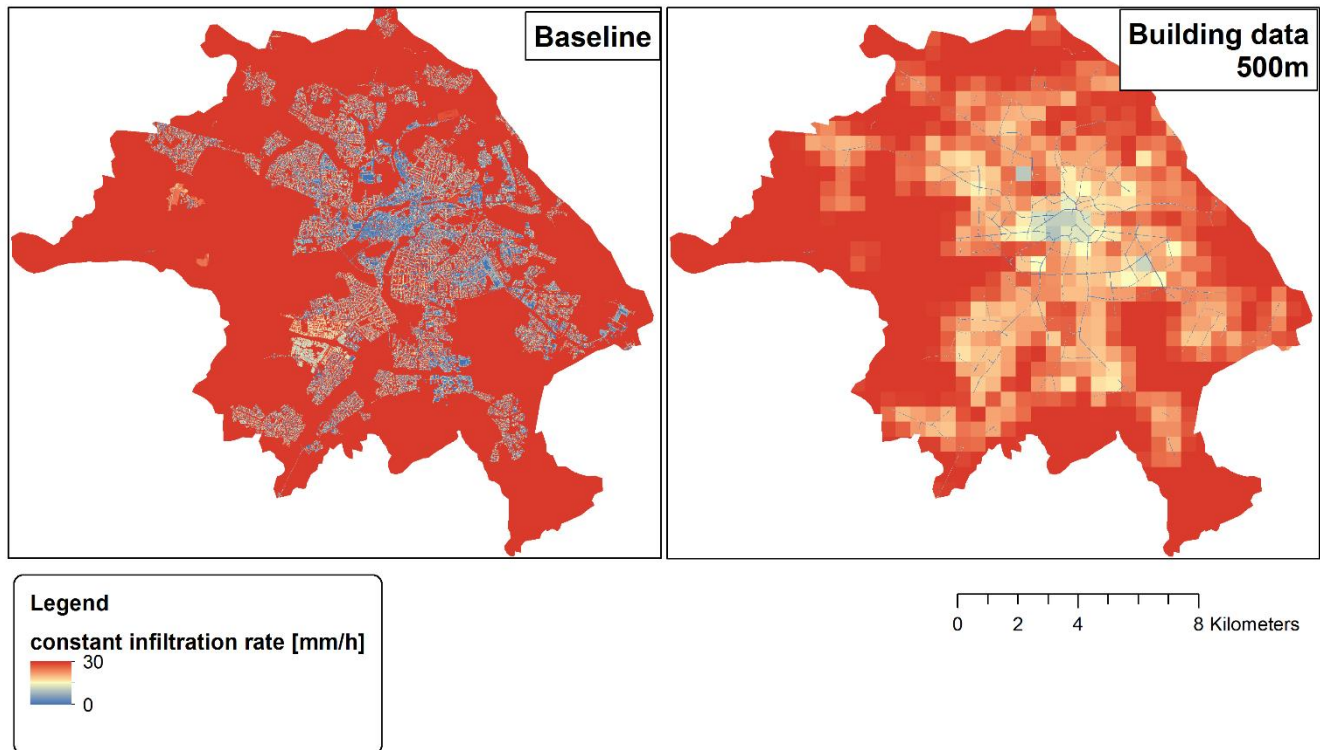

5

Figure S 2. Infiltration rates  $f_t(1 - IS)$  applied in 2D flood simulation considering the baseline dataset (left) and infiltration rates derived from a building dataset that was aggregated to a resolution of 500m (right).

## S4 Case study building types

**Table S 1. Case study building types and assignment to building classes in the two damage frameworks**

| <b>Type case study</b>                                         | <b>Damage class in this study</b>                                    | <b>Name in Olsen et al. (2015)</b> | <b>Name in Beckers et al. (2013)</b> |
|----------------------------------------------------------------|----------------------------------------------------------------------|------------------------------------|--------------------------------------|
| Residential block                                              | Residential                                                          | Residential                        | Residential                          |
| Public residence                                               | Residential                                                          | Residential                        | Residential                          |
| Residential row-house                                          | Residential                                                          | Residential                        | Residential                          |
| Detached residential                                           | Residential                                                          | Residential                        | Residential                          |
| Commercial (warehouse, shopping malls and similar)             | Commercial                                                           | Commercial                         | Industry and business area           |
| Industrial                                                     | Commercial                                                           | Commercial                         | Industry and business area           |
| Commercial services (kiosk, restaurants, etc.)                 | Commercial                                                           | Commercial                         | Industry and business area           |
| Utility (water treatment facility, transformer building, etc.) | Commercial                                                           | Commercial                         | Industry and business area           |
| Cultural                                                       | Public                                                               | Public Institution                 | Governmental utilization             |
| Public services (schools, police, medical facilities, etc.)    | Public                                                               | Public Institution                 | Governmental utilization             |
| Agricultural                                                   | Commercial with damages from Olsen et al. (2015), excluded otherwise | Commercial                         | Excluded                             |

## S5 Subdivision of the case study area for cross validation in damage regression

Figure S 3 illustrates how our case study area was subdivided into cells with an edge length of 2000m when performing cross-validation during damage regression. Different colours indicate different subareas. Areas where damages were zero were excluded from the dataset. These areas were typically located beyond the watershed and thus not considered in the 2D flood simulation (c.f. Figure S 2).

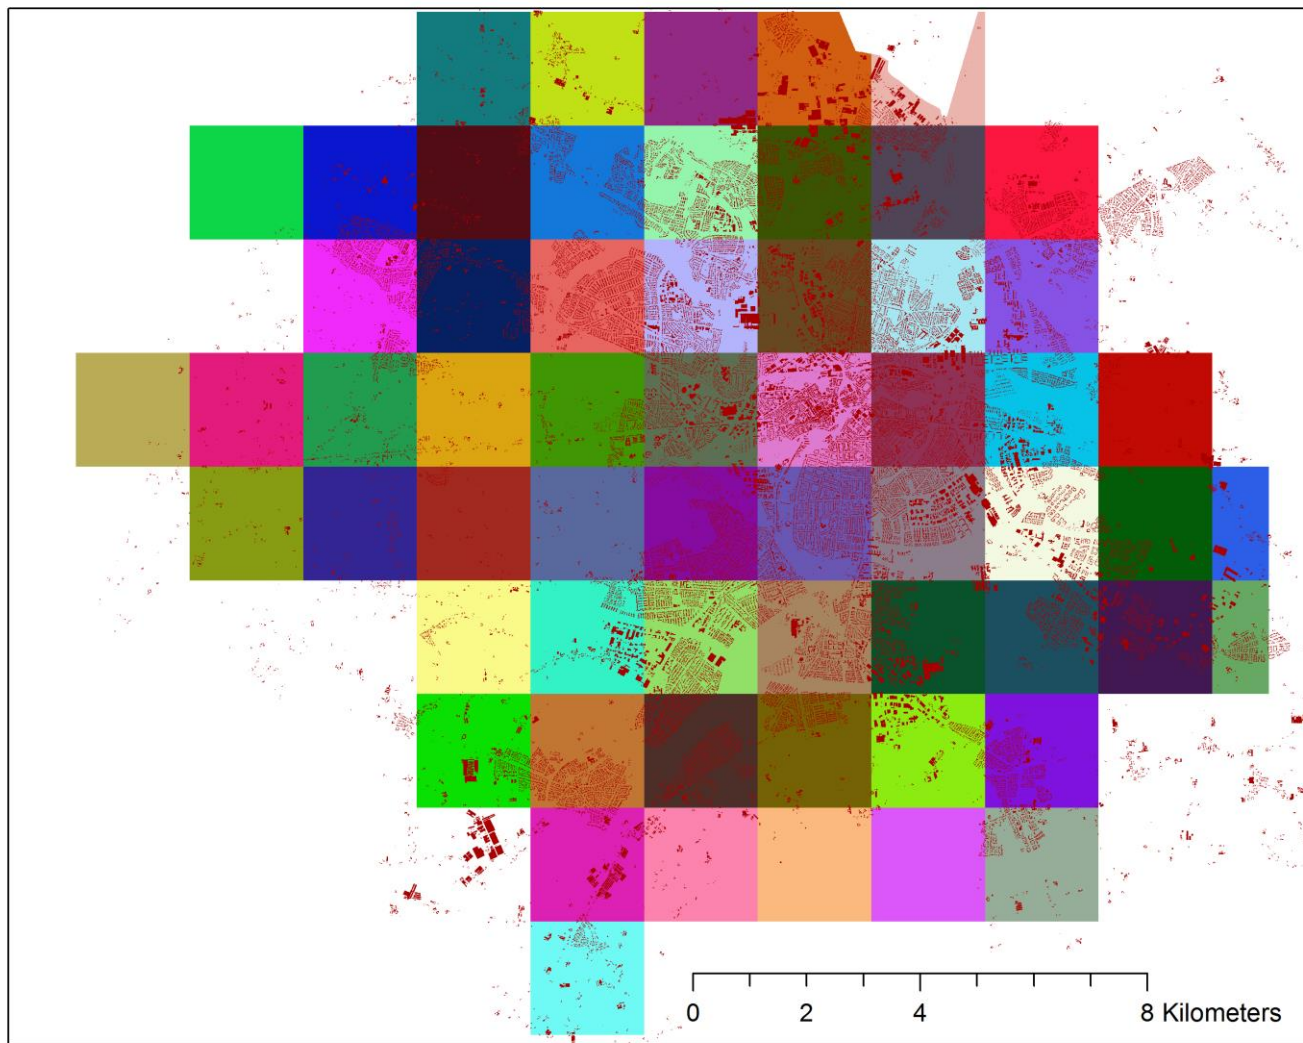

Figure S 3. Subdivision of the case study area into cells of 2000x2000m for cross validation during damage regression.

## S6 Total damage estimates in damage regression

Figure S 4 illustrates the variation of damage ratios  $DR_{tot}$  as a function of the data resolution applied when estimating parameters of the damage regression models.

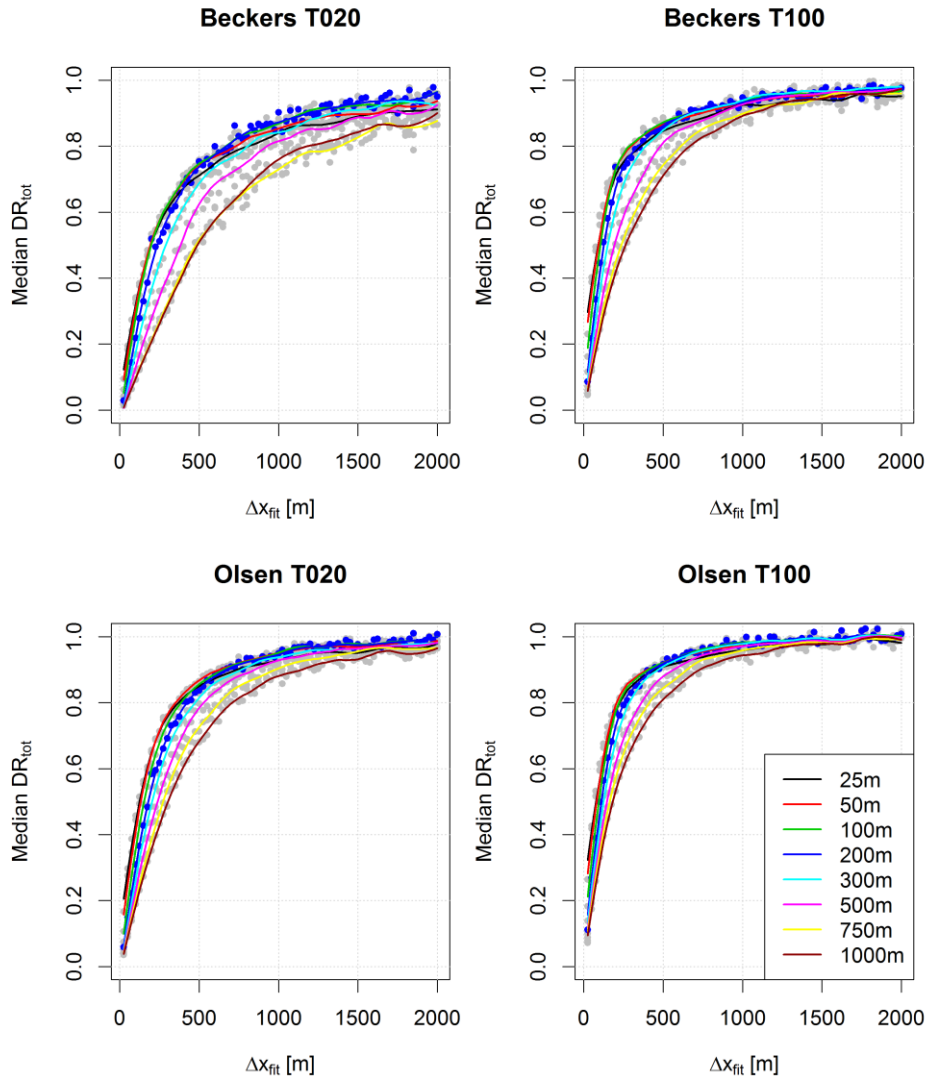

5

Figure S 4. Median of  $DR_{tot}$  obtained during cross validation for flood damage regression models (DMOD1) fitted at different data resolutions  $\Delta x_{fit}$  and considering building data aggregated to different resolutions in m (lines with varying colors). Lines were smoothed while dots indicate the true  $DR_{tot}$  values derived for each combination of fitting resolution and building input data resolution. Dots were colored blue for a building data resolution of 200m and grey otherwise.

10
